# Supplementary figures and images for: Closed-loop feedback control for microfluidic systems through automated capacitive fluid height sensing
Source: Royal Society of Chemistry journal article supplement (doi:10.1039/c7lc01223c), 2018-01-01

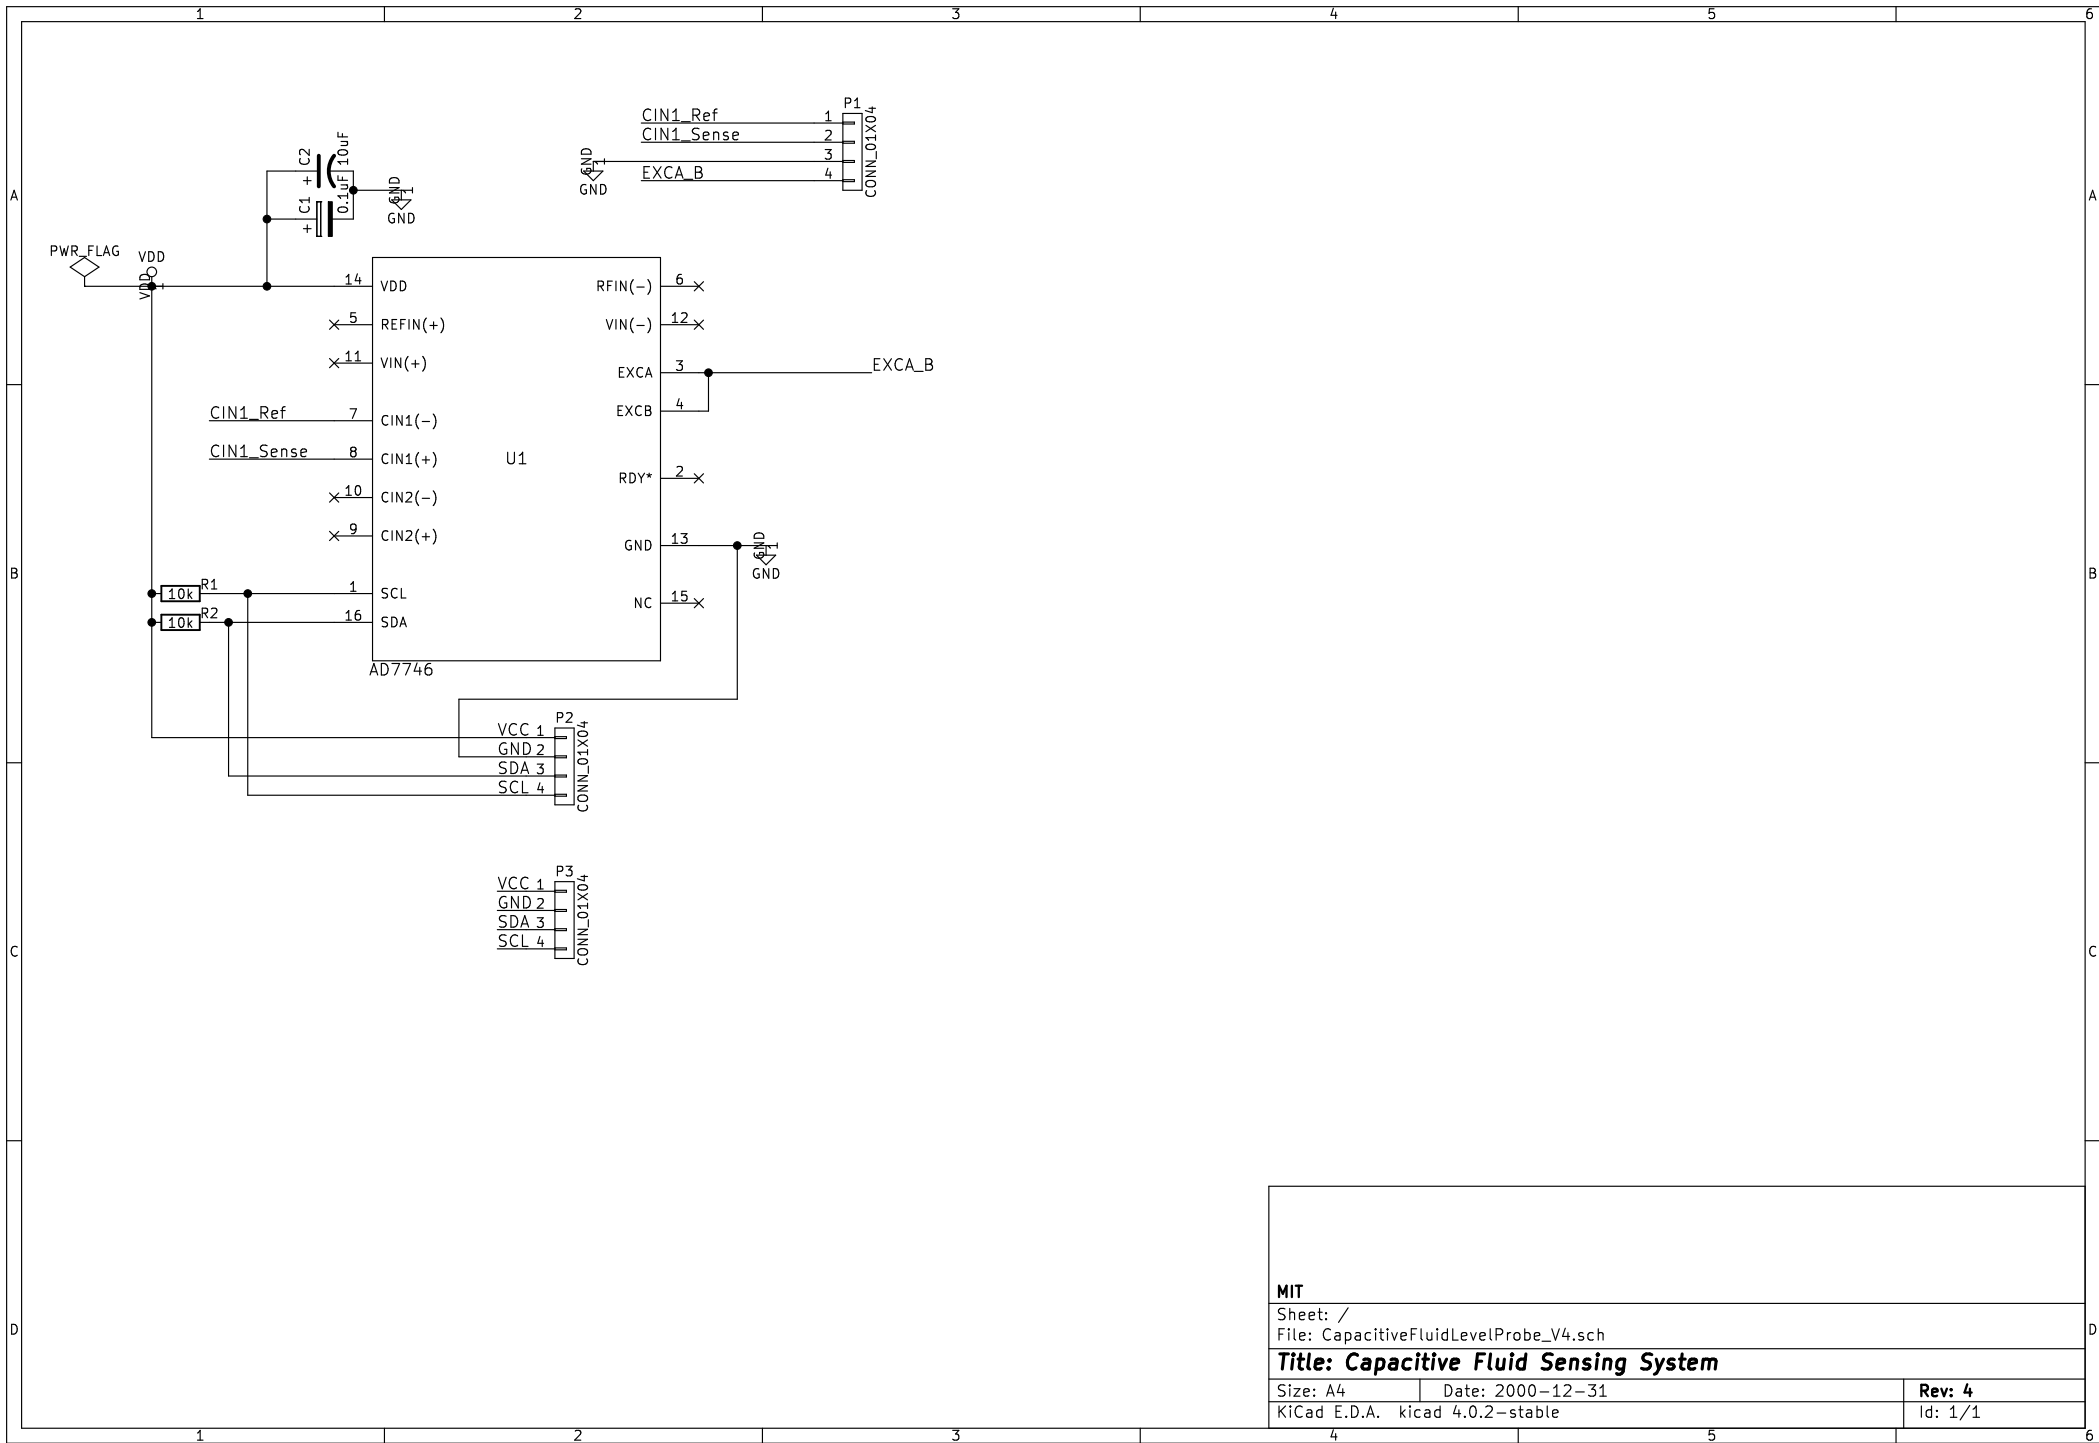

Supplement: c7lc01223c1.zip [file c7lc01223c1.zip]
